# Supplementary material
Source: PubMed Central journal article supplement (PMC4249304)
Supplement: IAI.02315-14_zii999090973so1.pdf [file IAI.02315-14_zii999090973so1.pdf]

**Table S1. Strains and plasmids.** The genotypes of all strains of *E. coli* utilized or constructed in this study and information about the plasmids used in this study.

| Bacterial strains and plasmids    | Genotype or relevant characteristics                                                                                                                                            | Source or Reference |
|-----------------------------------|---------------------------------------------------------------------------------------------------------------------------------------------------------------------------------|---------------------|
| <b>Bacterial strains</b>          |                                                                                                                                                                                 |                     |
| <i>E. coli</i> DH5 $\alpha$       | Plasmid propagation strain                                                                                                                                                      | Invitrogen          |
| <i>E. coli</i> S17- $\lambda$ pir | RK2 tra regulon, pir, host for pir-dependent plasmids                                                                                                                           | [1]                 |
| <i>E. coli</i> fnr-771(del)::kan  | F-, $\Delta$ ( <i>araD-araB</i> )567, $\Delta$ <i>lacZ</i> 4787(::rrnB-3), $\lambda$ -, $\Delta$ <i>fnr</i> -771::kan, rph-1, $\Delta$ ( <i>rhaD-rhaB</i> )568, <i>hsdR</i> 514 | [2]                 |
| UPEC CFT073                       | Blood isolate from a patient with acute pyelonephritis                                                                                                                          | [3]                 |
| LMP10                             | CFT073 $\Delta$ <i>lacZYA</i>                                                                                                                                                   | [4]                 |
| LMP11                             | CFT073 $\Delta$ <i>lacZYA</i> ::Chlr                                                                                                                                            | [4]                 |
|                                   | CFT073 $\Delta$ <i>fnr</i>                                                                                                                                                      | This study          |
|                                   | CFT073 $\Delta$ <i>fnr</i> ::kan                                                                                                                                                | This study          |
| CFT073 <sup>OFF</sup>             | IRL, fim invertible element locked off                                                                                                                                          | [5]                 |
| CFT073 <sup>ON</sup>              | IRL, fim invertible element locked on                                                                                                                                           | [5]                 |
|                                   | CFT073 $\Delta$ <i>lacZYA</i> $\Delta$ <i>fnr</i>                                                                                                                               | This study          |
|                                   | CFT073 $\Delta$ <i>lacZYA</i> <i>fimA-lacZ</i>                                                                                                                                  | This study          |
|                                   | CFT073 $\Delta$ <i>lacZYA</i> $\Delta$ <i>fnr</i> <i>fimA-lacZ</i>                                                                                                              | This study          |
|                                   | CFT073 $\Delta$ <i>lacZYA</i> <i>fimB-lacZ</i>                                                                                                                                  | This study          |
|                                   | CFT073 $\Delta$ <i>lacZYA</i> $\Delta$ <i>fnr</i> <i>fimB-lacZ</i>                                                                                                              | This study          |
|                                   | CFT073 $\Delta$ <i>lacZYA</i> <i>fimE-lacZ</i>                                                                                                                                  | This study          |
|                                   | CFT073 $\Delta$ <i>lacZYA</i> $\Delta$ <i>fnr</i> <i>fimE-lacZ</i>                                                                                                              | This study          |
|                                   | CFT073 $\Delta$ <i>lacZYA</i> <i>papA-lacZ</i>                                                                                                                                  | This study          |
|                                   | CFT073 $\Delta$ <i>lacZYA</i> $\Delta$ <i>fnr</i> <i>papA-lacZ</i>                                                                                                              | This study          |
|                                   | CFT073 $\Delta$ <i>lacZYA</i> <i>papB-lacZ</i>                                                                                                                                  | This study          |
|                                   | CFT073 $\Delta$ <i>lacZYA</i> $\Delta$ <i>fnr</i> <i>papB-lacZ</i>                                                                                                              | This study          |
|                                   | CFT073 $\Delta$ <i>lacZYA</i> <i>c5038-lacZ</i>                                                                                                                                 | [4]                 |
|                                   | CFT073 $\Delta$ <i>lacZYA</i> $\Delta$ <i>fnr</i> <i>c5038-lacZ</i>                                                                                                             | This study          |
|                                   | CFT073 $\Delta$ <i>lacZYA</i> <i>kguS-lacZ</i>                                                                                                                                  | [4]                 |
|                                   | CFT073 $\Delta$ <i>lacZYA</i> $\Delta$ <i>fnr</i> <i>kguS-lacZ</i>                                                                                                              | This study          |
|                                   | CFT073 $\Delta$ <i>lacZYA</i> <i>kguR-lacZ</i>                                                                                                                                  | [4]                 |
|                                   | CFT073 $\Delta$ <i>lacZYA</i> $\Delta$ <i>fnr</i> <i>kguR-lacZ</i>                                                                                                              | This study          |
|                                   | CFT073 $\Delta$ <i>lacZYA</i> <i>hlyA-lacZ</i>                                                                                                                                  | This study          |
|                                   | CFT073 $\Delta$ <i>lacZYA</i> $\Delta$ <i>fnr</i> <i>hlyA-lacZ</i>                                                                                                              | This study          |
|                                   | CFT073 $\Delta$ <i>lacZYA</i> <i>c3565-lacZ</i>                                                                                                                                 | This study          |
|                                   | CFT073 $\Delta$ <i>lacZYA</i> $\Delta$ <i>fnr</i> <i>c3565-lacZ</i>                                                                                                             | This study          |
|                                   | CFT073 $\Delta$ <i>lacZYA</i> <i>fliA-lacZ</i>                                                                                                                                  | This study          |
|                                   | CFT073 $\Delta$ <i>lacZYA</i> $\Delta$ <i>fnr</i> <i>fliA-lacZ</i>                                                                                                              | This study          |
|                                   | CFT073 $\Delta$ <i>lacZYA</i> <i>fliC-lacZ</i>                                                                                                                                  | This study          |
|                                   | CFT073 $\Delta$ <i>lacZYA</i> $\Delta$ <i>fnr</i> <i>fliC-lacZ</i>                                                                                                              | This study          |
|                                   | CFT073 $\Delta$ <i>lacZYA</i> <i>flhDC-lacZ</i>                                                                                                                                 | This study          |
|                                   | CFT073 $\Delta$ <i>lacZYA</i> $\Delta$ <i>fnr</i> <i>flhDC-lacZ</i>                                                                                                             | This study          |

| Plasmids                                |                                                                               |            |
|-----------------------------------------|-------------------------------------------------------------------------------|------------|
| pET28a-( <i>fnrD154A</i> ) <sub>2</sub> | expression plasmid of FNR protein suicide plasmid for chromosomal <i>lacZ</i> | [6]        |
| pVIK112                                 | transcriptional fusion                                                        | [7]        |
| pGEN-MCS                                | low copy plasmid for complementation                                          | [8]        |
| pGEM-FNR                                | pGEN-MCS carrying <i>fnr</i> coding region and 500bp upstream promoter region | This study |
| pKD3                                    | template for $\lambda$ -Red Chlr cassette                                     | [9]        |
| pKD4                                    | template for $\lambda$ -Red Kanr cassette                                     | [9]        |
| pCP20                                   | encodes FLP recombinase for removal of resistance cassette                    | [9]        |
| pKD46                                   | $\lambda$ -Red recombinase expression                                         | [9]        |

1. Simon R, Prierer U, Puhler A (1983) A Broad Host Range Mobilization System for In Vivo Genetic Engineering: Transposon Mutagenesis in Gram Negative Bacteria. *Nat Biotech* 1: 784-791.
2. Baba T, Ara T, Hasegawa M, Takai Y, Okumura Y, et al. (2006) Construction of *Escherichia coli* K-12 in-frame, single-gene knockout mutants: the Keio collection. *Molecular Systems Biology* 2.
3. Welch RA, Burland V, Plunkett G, 3rd, Redford P, Roesch P, et al. (2002) Extensive mosaic structure revealed by the complete genome sequence of uropathogenic *Escherichia coli*. *Proc Natl Acad Sci U S A* 99: 17020-17024.
4. Cai W, Wannemuehler Y, Dell'Anna G, Nicholson B, Barbieri NL, et al. (2013) A novel two-component signaling system facilitates uropathogenic *Escherichia coli*'s ability to exploit abundant host metabolites. *Plos Pathogens* 9: e1003428.
5. Gunther NW, Snyder JA, Lockatell V, Blomfield I, Johnson DE, et al. (2002) Assessment of virulence of uropathogenic *Escherichia coli* type 1 fimbrial mutants in which the invertible element is phase-locked on or off. *Infection and Immunity* 70: 3344-3354.
6. Shan Y, Pan Q, Liu J, Huang F, Sun H, et al. (2012) Covalently linking the *Escherichia coli* global anaerobic regulator FNR in tandem allows it to function as an oxygen stable dimer. *Biochemical and Biophysical Research Communications* 419: 43-48.
7. Kalogeraki VS, Winans SC (1997) Suicide plasmids containing promoterless reporter genes can simultaneously disrupt and create fusions to target genes of diverse bacteria. *Gene* 188: 69-75.
8. Lane MC, Alteri CJ, Smith SN, Mobley HLT (2007) Expression of flagella is coincident with uropathogenic *Escherichia coli* ascension to the upper urinary tract. *Proceedings of the National Academy of Sciences of the United States of America* 104: 16669-16674.
9. Datsenko KA, Wanner BL (2000) One-step inactivation of chromosomal genes in *Escherichia coli* K-12 using PCR products. *Proceedings of the National Academy of Sciences of the United States of America* 97: 6640-6645.

**Table S2. Oligonucleotides.** Oligonucleotide sequences used as PCR primers.

| <b>Primers</b>                 | <b>Sequence (5'-3')</b>                       |
|--------------------------------|-----------------------------------------------|
| <i>General PCR for cloning</i> |                                               |
| pGEN-FNR-F                     | GTACCATATGGATCGAATCCCATCAGCATC                |
| pGEN-FNR-R                     | CCGAGTCGACAGGATCGATAACAACGAGCA                |
| <i>For lacZ fusion</i>         |                                               |
| fimA-lacZ-5'-F                 | CACGGAATTC GTTGATGCAGGCTCTGTTGA               |
| fimA-lacZ-5'-R                 | GCAGTCTAGA TTATTGATACTGAACCTTGA               |
| fimB-lacZ-5'-F                 | GTCGGAATTC <sup>CCG</sup> GATTGAGGATTTCCGATA  |
| fimB-lacZ-5'-R                 | CCAGTCTAGACTATAAAACAGCGTGACGCT                |
| fimE-lacZ-5'-F                 | GACGGAATTCGGCATGGGATGCGTATTAGT                |
| fimE-lacZ-5'-R                 | CGAGTCTAGATCAAAC <sup>TCTTCTCTTTT</sup> TA    |
| papA-lacZ-5'-F                 | CACGGAATTCATCAGTCGGTCAGGAAATGC                |
| papA-lacZ-5'-R                 | GCAGTCTAGAGAGCAGCATATGCACCAAAA                |
| papB-lacZ-5'-F                 | CACGGAATTC GGCCCCTGGATATATGCTTC               |
| papB-lacZ-5'-R                 | GCAGTCTAGA CTCCATCATGCCTGTTTCAGA              |
| c5038-lacZ-5'-F                | AGTCGAATTC <sup>TGGTGGTAATGCGGAAGA</sup> AC   |
| c5038-lacZ-5'-R                | ATCGTCTAGATATCGCCCAGTGGCAGAAGG                |
| kguS-lacZ-5'-F                 | ATGCGAATTC <sup>TCTCGCTTTCTGGCGAGA</sup> AAGG |
| kguS-lacZ-5'-R                 | GCTGTCTAGAGAAACCGCGAGCATGATAAG                |
| kguR-lacZ-3'-F                 | ATCGGAATTC <sup>TGTTATTGCAGCGACCA</sup> AGG   |
| kguR-lacZ-3'-R                 | GCACTCTAGATTAGCTGGATGATTCTGGTC                |
| hlyA-lacZ-5'-F                 | ATCGGAATTC <sup>TATTGATTTCCGGG</sup> AT       |
| hlyA-lacZ-5'-R                 | ACCGTCTAGATTATGCTGAGCTGTC                     |
| c3565-lacZ-5'-F                | GCTGTCTAGAGAAACCGCGAGCATGATAAG                |

|                 |                                           |
|-----------------|-------------------------------------------|
| c3565-lacZ-5'-R | <u>ATCGGAATTCTGTTATTGCAGCGACCAAGG</u>     |
| hlyD-lacZ-5'-F  | CACG <u>GGAATTC</u> TTCGGGAAAAGTTCAGCAAC  |
| hlyD-lacZ-5'-R  | GCAGT <u>CTAGA</u> TTAACGCTCATGTAACTTTCT  |
| fliA-lacZ-3'-F  | CACG <u>CCCGGG</u> ATCAGGCCTACAAGGGGAAT   |
| fliA-lacZ-3'-R  | GCAGT <u>CTAGA</u> GCGTTCGACGGCATTAAAGTA  |
| fliC-lacZ-3'-F  | CACG <u>GGAATTC</u> CGACACGTAAAACGAATACCG |
| fliC-lacZ-3'-R  | GCAGT <u>CTAGA</u> CGCAGACTGGTTCTTGTGGA   |
| flhDC-lacZ-3'-F | CACG <u>GGAATTC</u> CGGTGAGACCGCATAAAAAT  |
| flhDC-lacZ-3'-R | GCAGT <u>CTAGA</u> CCCAGGTCATAAACCAGTCG   |

***For Deletion<sup>a</sup>***

|           |                      |
|-----------|----------------------|
| Del-fnr-F | GACGGTTATGCCAGACCACT |
| Del-fnr-R | AAGCGACAAGCTTCGTGAAT |

**For ON/OFF switch**

|          |                      |
|----------|----------------------|
| fimEin F | GGCATGCTTGTGGTTATGAA |
| fimAin R | TTTTCATGCTGCTTTCCTTT |

***For EMSA***

|                              |                      |
|------------------------------|----------------------|
| Inside negative control-For1 | ATCTGTGTGGTAAGAGAATC |
| Inside negative control-Rev1 | TGGTGCGCCATGGGATATTG |
| PromfimI-For                 | TTTGCAGAGCCAGTACGTTG |
| PromfimI-Rev                 | GTTGATGCAGGCTCTGTTGA |
| PrompapI-For                 | TTCACCCGTTTTTCAGAAGC |
| PrompapI-Rev                 | AAAATCCGCACACTGACCAT |
| PromkguR-For                 | AAGCCATAACGTTCCGCTTC |
| PromkguR-Rev                 | TTGCTACTGTTTGCCGCTAC |

|              |                      |
|--------------|----------------------|
| Prom3565-For | CAGCGTAACCACAGAGGATG |
| Prom3565-Rev | CGCAACAGAGCTGCAATATC |
| PromfliC-For | CGCAGACTGGTTCTTGTTGA |
| PromfliC-Rev | GGGAATAAGGGGCAGAGAAA |
| PromydfZ-For | GCGACTGGTTTAGCGAAGAG |
| PromydfZ-Rev | TGGTGATTGCGTTACGGTTA |

- 
- Underlined are restriction cutting sites;
  - Capital letters represent homologous fragments of the deleted genes.
